# Supplementary material for: Valence state regulation of iron oxide composited with graphene towards negative electrodes in asymmetric supercapacitors
Source: Royal Society of Chemistry journal article supplement (doi:10.1039/d4tc00802b), 2024-01-01
Supplement: d4tc00802b1.pdf [file d4tc00802b1.pdf]

## Supporting Information

### **Valence state regulation of iron oxide composited with graphene towards negative electrodes in asymmetric supercapacitors**

Zhihao Song <sup>a, b, c</sup>, Nian Li <sup>a, c, \*</sup>, Jun Kang <sup>a, b, c</sup>, Liqing Chen <sup>a, b, c</sup>, Yanping Song <sup>a, b, c</sup>,  
Xinling Yu <sup>d</sup>, Hu Ge <sup>c, d</sup>, Zhao Li <sup>a, b, c</sup>, Na Hong <sup>a, b, c</sup>, Shudong Zhang <sup>a, c, \*</sup>, and  
Zhenyang Wang <sup>a, c, \*</sup>

<sup>a</sup> Institute of Solid State Physics, Hefei Institutes of Physical Science, Chinese  
Academy of Sciences, Hefei, 230031, China.

<sup>b</sup> University of Science and Technology of China, Hefei, 230026, China.

<sup>c</sup> Key Laboratory of Photovoltaic and Energy Conservation Materials, Hefei Institutes  
of Physical Science, Chinese Academy of Sciences, Hefei, 230031, China.

<sup>d</sup> Hefei University, Hefei, 230601, China.

E-mail:

linian@issp.ac.cn; sdzhang@iim.ac.cn; zywang@iim.ac.cn

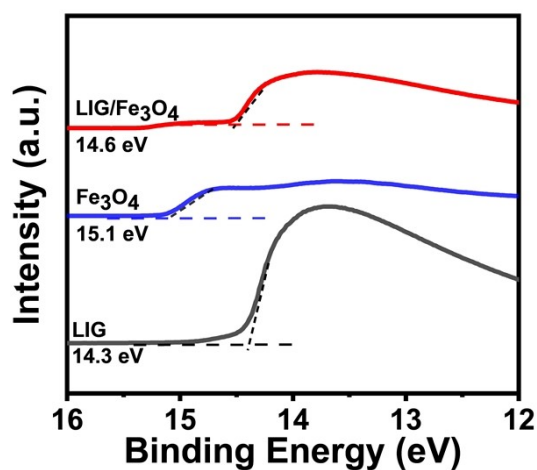

Figure S1. UPS spectra of LIG, Fe<sub>3</sub>O<sub>4</sub> and LIG/Fe<sub>3</sub>O<sub>4</sub>.

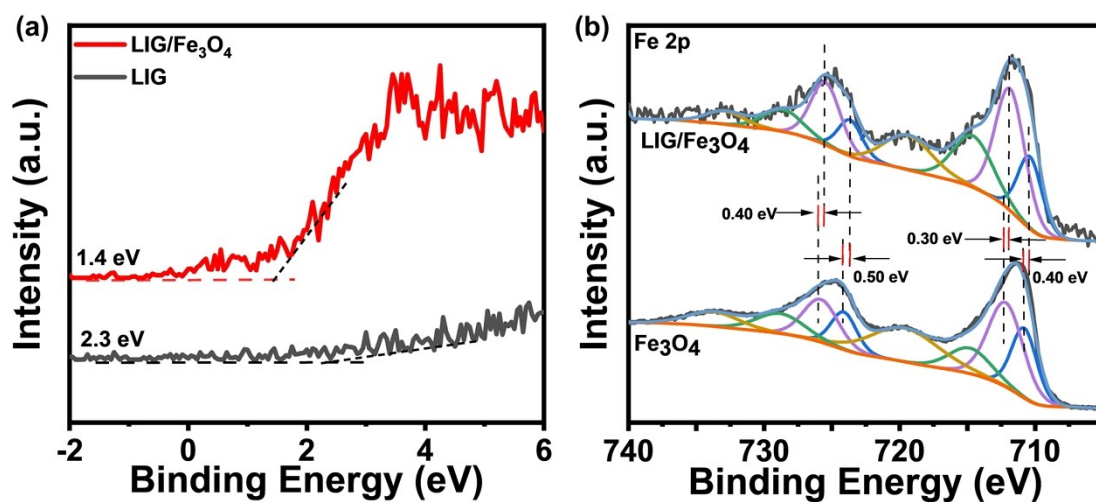

Figure S2. (a) Valence band XPS of LIG and LIG/Fe<sub>3</sub>O<sub>4</sub>. (b) XPS spectra of Fe2p of Fe<sub>3</sub>O<sub>4</sub> and LIG/Fe<sub>3</sub>O<sub>4</sub>.

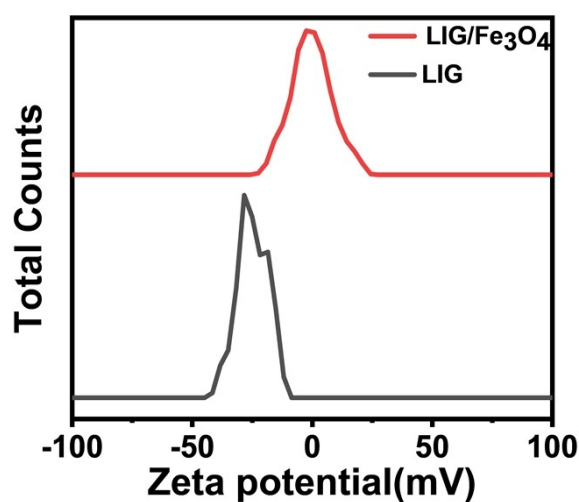

Figure S3. The zeta potential analysis of LIG and LIG/Fe<sub>3</sub>O<sub>4</sub> composites.

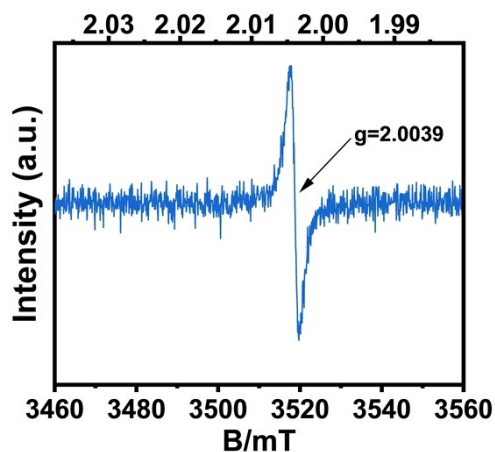

Figure S4. The EPR spectra of LF (LIG/Fe<sub>3</sub>O<sub>4</sub>).

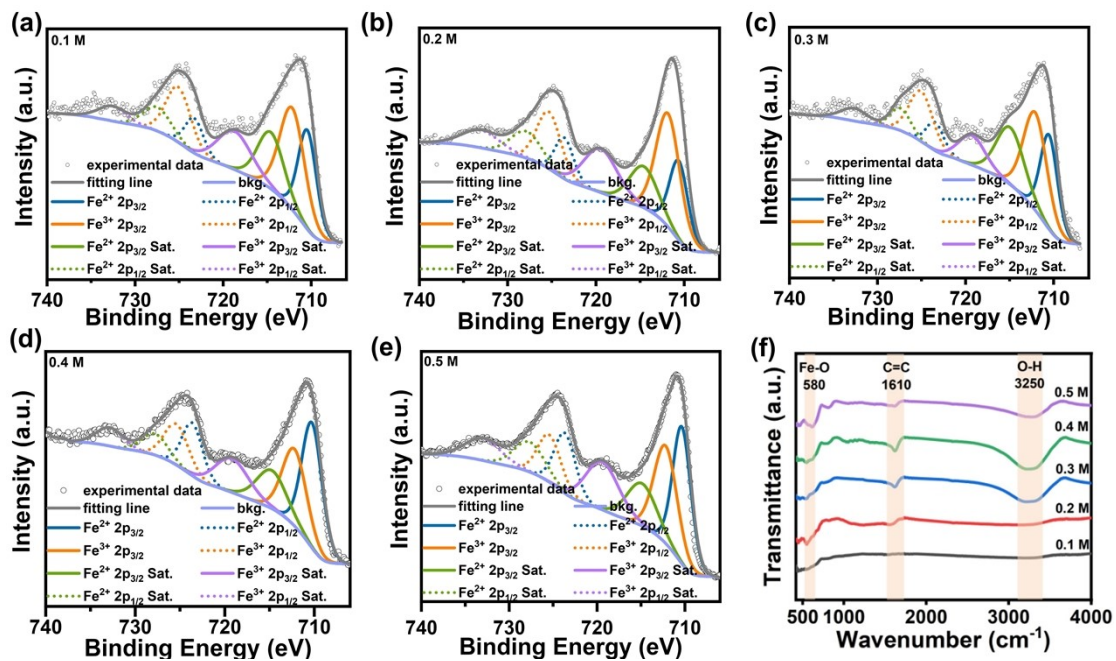

Figure S5. The Fe2p high-resolution XPS spectra of various concentrations(a-e); FTIR spectra of MF under different concentration(f).

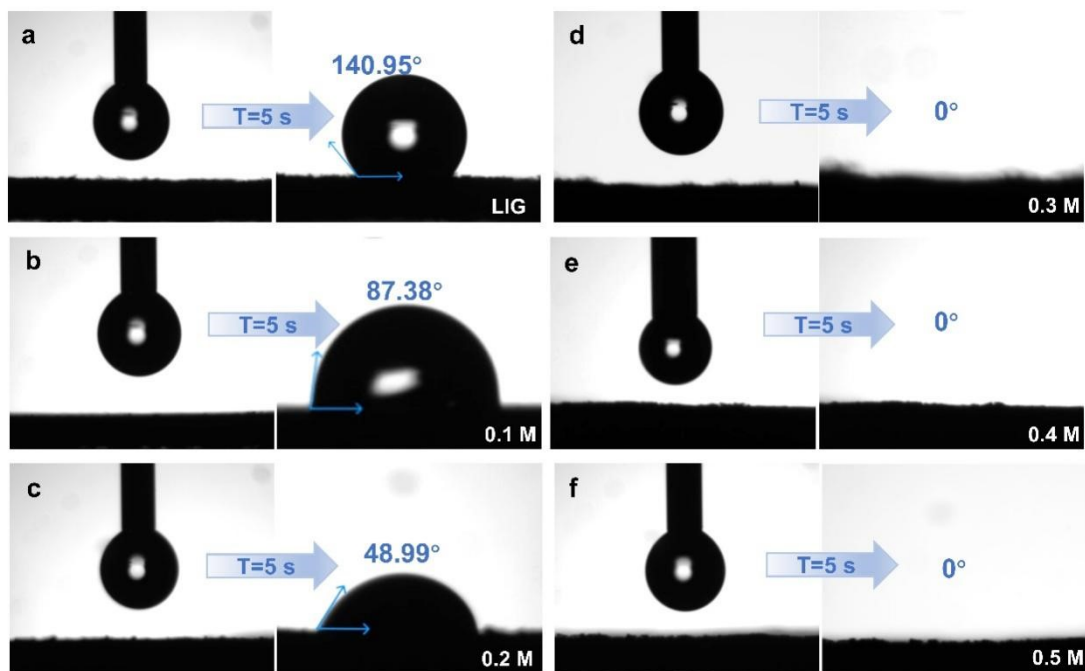

Figure S6. Contact angle testing of LIG (a) and MF (b-f) at different concentration.

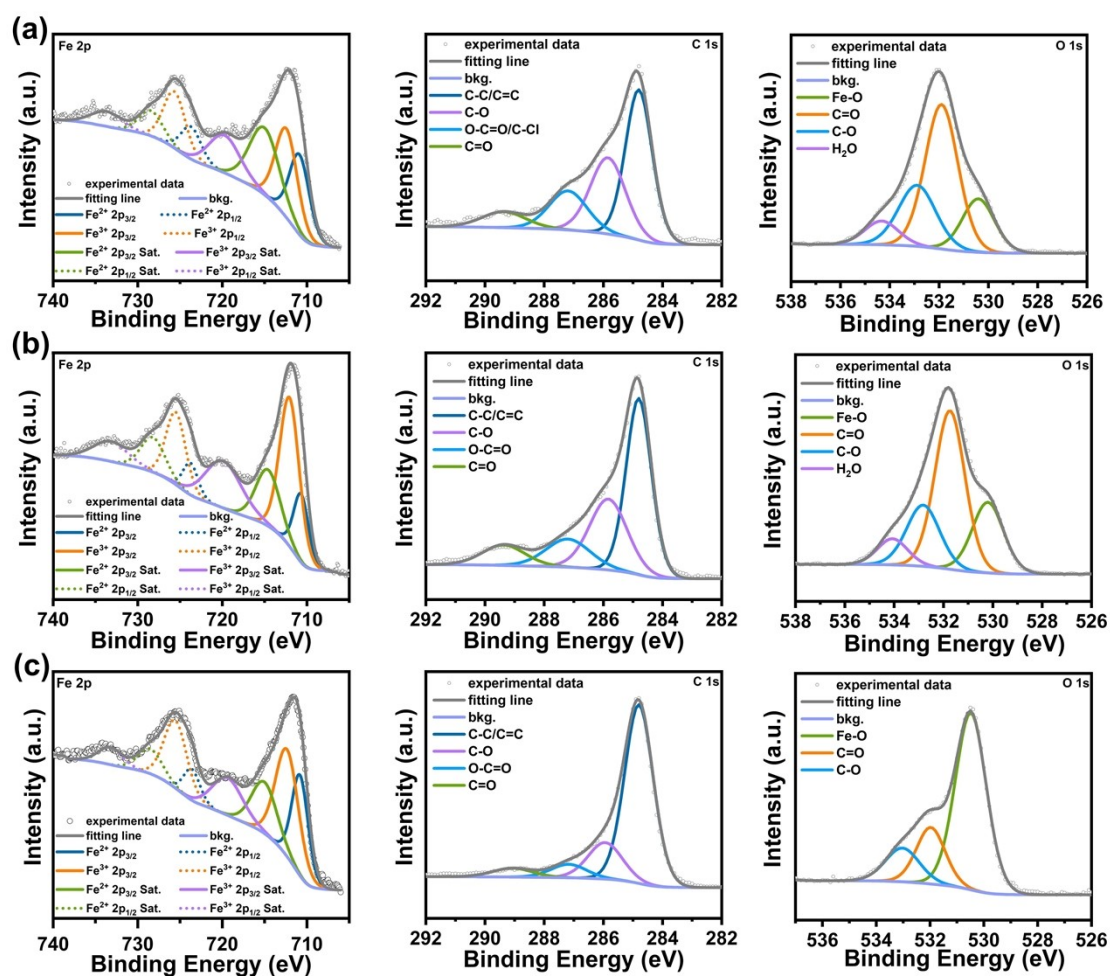

Figure S7. The Fe2p, C 1s, O1s of samples at 2 W(a); 6 W(b); 10 W(c).

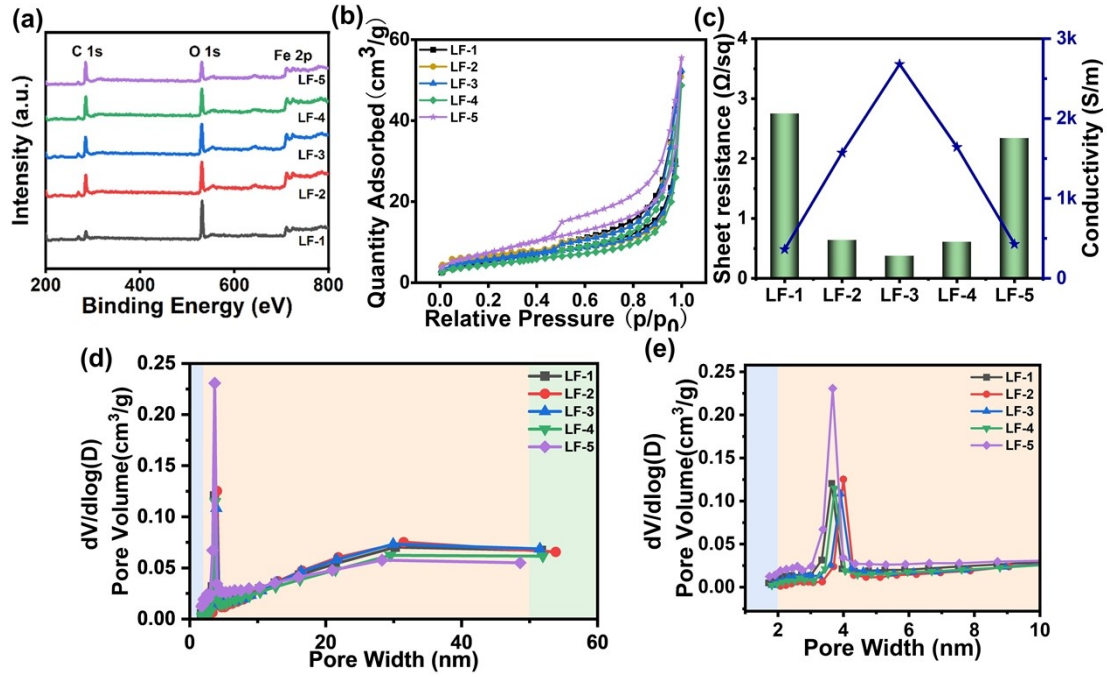

**Figure S8.** The full XPS spectrum of LF (a); The BET analysis results of different LF samples(b); The resistance and conductivity of different LF samples(c); The Porosity (calculated by using the DFT model) of LF and the pores of different ranges are classified and enlarged (d).

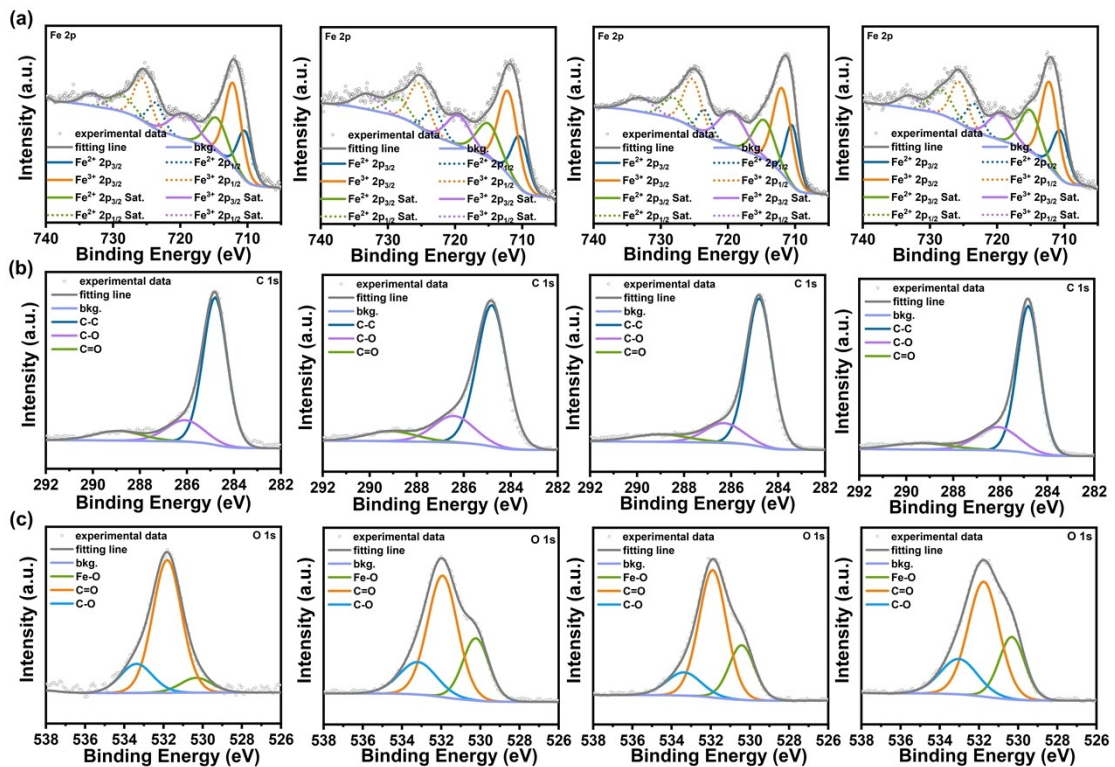

**Figure S9.** The Fe 2p (a), C 1s (b), O1s (c) of LF-1, LF-2, LF-4, LF-5.

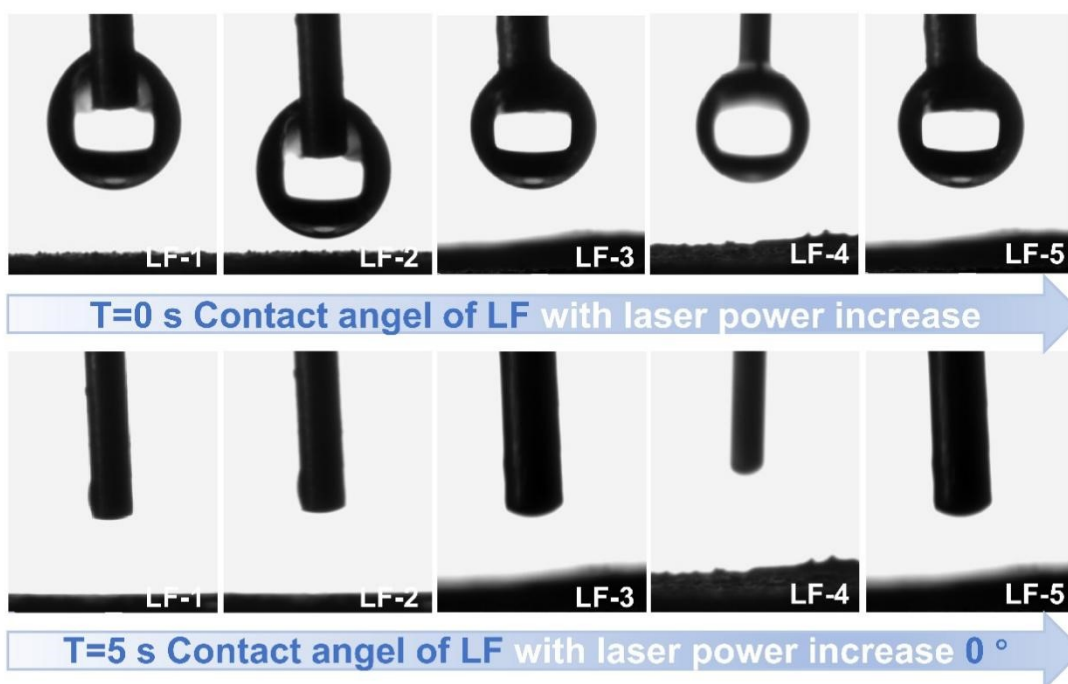

**Figure S10.** Contact angle testing of LF at different laser power.

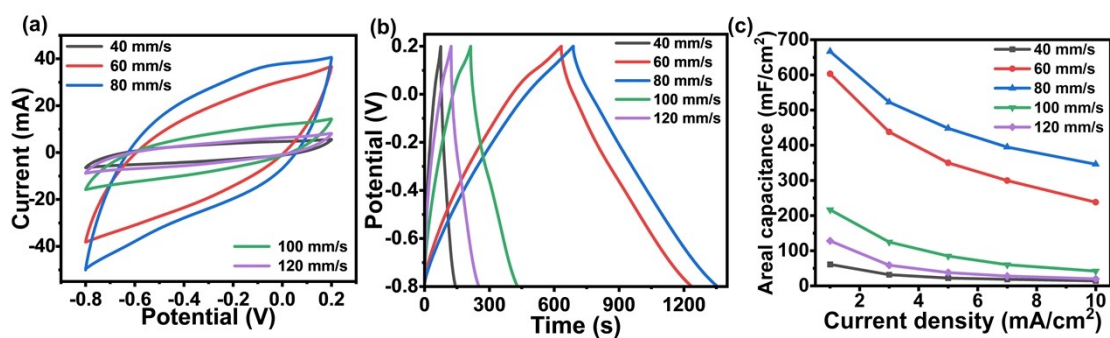

**Figure S11.** (a) The CV curves at the voltage scanning rates of 100 mV/s; (b) The GCD diagrams at 1 mA/cm<sup>2</sup>; (c) Areal capacitance of different laser scanning rate.

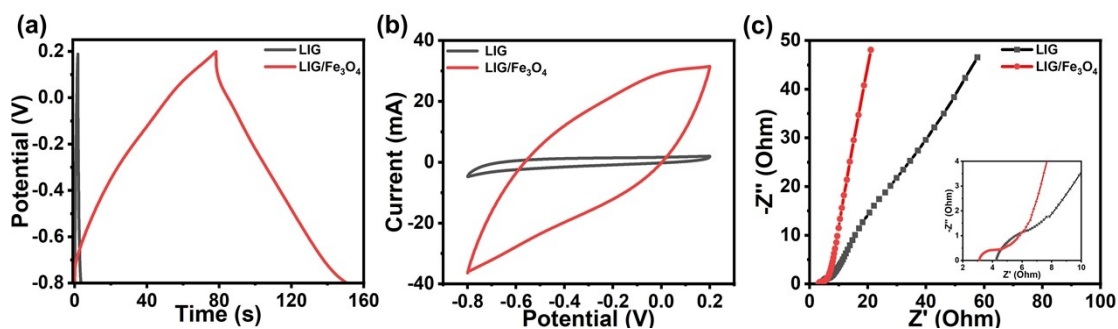

Figure S12. Comparison of (a)The CV curves; (b) The GCD diagram ;(c) The Nyquist curves between LIG and LF.

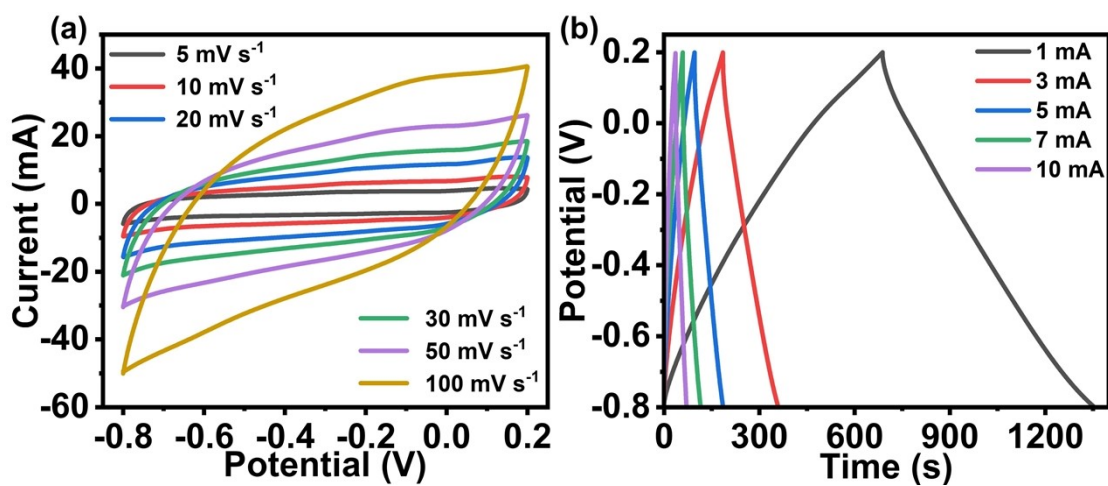

Figure S13. (a) The CV curves of the LF-3. (b) The GCD curves of the LF-3.

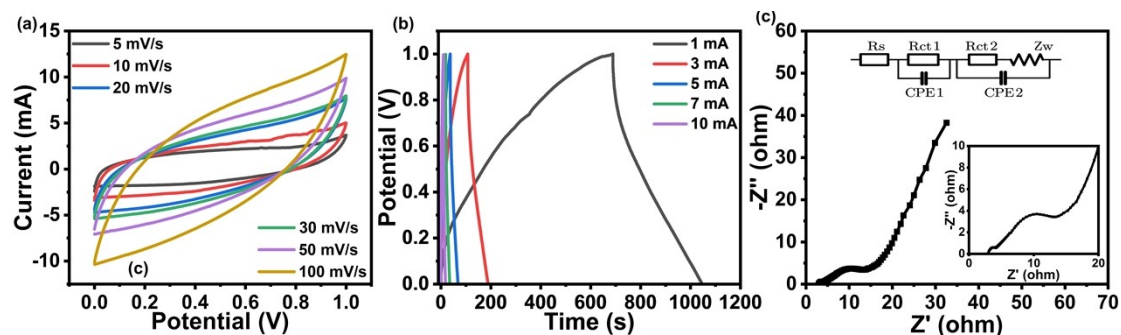

Figure S14. The CV (a), GCD (b) and (c) EIS curves of the AC.

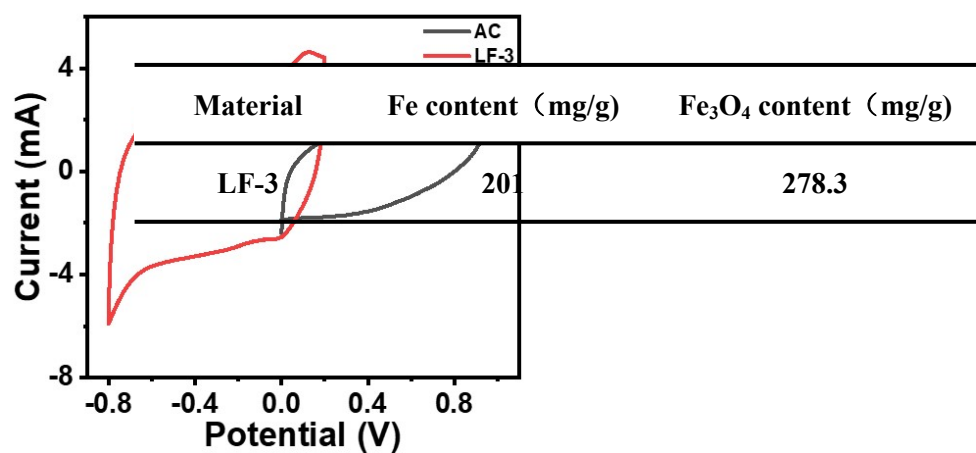

Figure S15. Comparison of the CV curves at 5 mV/s between AC and LF-3.

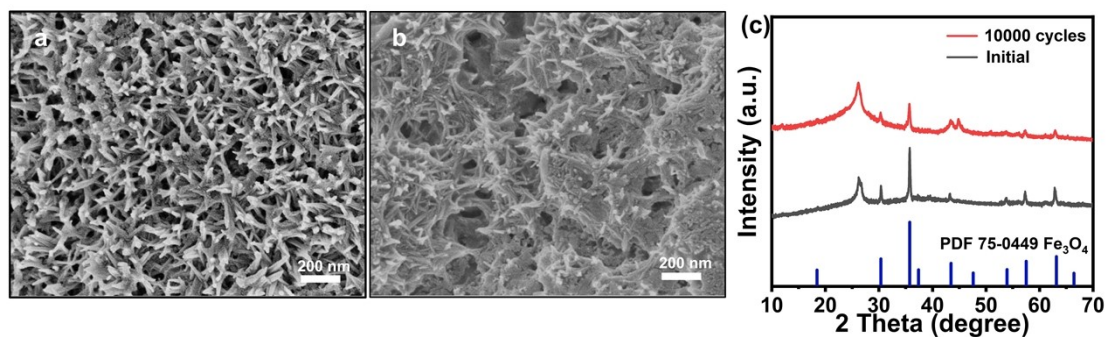

Figure S16. SEM image of LF-3 initially (a) and after 10000 cycles (b). (c) XRD image of LF-3 initially and after 10000 cycles.

Table S1 Content of Fe and Fe<sub>3</sub>O<sub>4</sub> in LF-3 by inductively coupled plasma test (ICP).



**Table S2** Comparison of voltage ranges for different negative electrode materials.

| Material                                       | Voltage            | Ref              |
|------------------------------------------------|--------------------|------------------|
| <b>Mxene/Fe<sub>3</sub>O<sub>4</sub>/MXene</b> | <b>-0.7-0 V</b>    | <b>72</b>        |
| <b>Fe<sub>3</sub>O<sub>4</sub> /MXene/RGO</b>  | <b>-1-0 V</b>      | <b>78</b>        |
| <b>NCSs@Fe<sub>3</sub>O<sub>4</sub></b>        | <b>-1-0 V</b>      | <b>79</b>        |
| <b>Fe<sub>3</sub>O<sub>4</sub>@3DGr</b>        | <b>-1-0 V</b>      | <b>80</b>        |
| <b>Fe<sub>3</sub>O<sub>4</sub> NSs@ERGO</b>    | <b>-1.1-0 V</b>    | <b>81</b>        |
| <b>Fe<sub>3</sub>O<sub>4</sub>@C</b>           | <b>-1- -0.15 V</b> | <b>82</b>        |
| <b>Fe<sub>3</sub>O<sub>4</sub>@PANI</b>        | <b>-0.8-0.2 V</b>  | <b>83</b>        |
| <b>LF</b>                                      | <b>-0.8-0.2 V</b>  | <b>This work</b> |

**Table S3** Impedance parameters derived using equivalent circuit model for the LF.

| Material    | R <sub>s</sub> (Ω) | R <sub>ct</sub> (Ω) | Z <sub>w</sub> (Ω) |
|-------------|--------------------|---------------------|--------------------|
| <b>LF-1</b> | <b>3.19</b>        | <b>5.91</b>         | <b>8.24</b>        |
| <b>LF-2</b> | <b>3.15</b>        | <b>4.40</b>         | <b>6.10</b>        |
| <b>LF-3</b> | <b>2.96</b>        | <b>1.38</b>         | <b>1.53</b>        |
| <b>LF-4</b> | <b>3.08</b>        | <b>2.46</b>         | <b>2.93</b>        |
| <b>LF-5</b> | <b>3.53</b>        | <b>6.26</b>         | <b>6.28</b>        |

**Table S4**

Comparison

of the areal capacitance with various Fe<sub>3</sub>O<sub>4</sub> material.

| Material                                         | Coulombic efficiency | Ref (supplemental)             |           |
|--------------------------------------------------|----------------------|--------------------------------|-----------|
| LIG/Fe <sub>3</sub> O <sub>4</sub>               | 0-1 V                | 43.6 (1mA/cm <sup>2</sup> )    | 71        |
| PPy/Fe <sub>2</sub> O <sub>3</sub> /rGO          |                      | 93.0%                          | 1         |
| Mxene/Fe <sub>3</sub> O <sub>4</sub> /MXene      | 0-0.7 V              | 46.4 (0.5 mA/cm <sup>2</sup> ) | 72        |
| Fe <sub>2</sub> O <sub>3</sub> /graphene aerogel |                      | 90.0%                          | 2         |
| C- Fe <sub>3</sub> O <sub>4</sub> /PLA           | 0-2 V                | 47.9 (1 mA/cm <sup>2</sup> )   | 73        |
| ATA-Fe <sub>3</sub> O <sub>4</sub> /rGO          |                      | 86.0%                          | 3         |
| Fe <sub>3</sub> O <sub>4</sub> -FMWCNT           | 0-2 V                | 78.5 (1 mA/cm <sup>2</sup> )   | 74        |
| 3D Fe <sub>3</sub> O <sub>4</sub> /rGO           |                      | 91.4%                          | 4         |
| LF                                               | 0-1.5 V              | 106.4 (1 mA/cm <sup>2</sup> )  | This work |
| graphene/Fe <sub>2</sub> O <sub>3</sub>          |                      | 92.1%                          | 5         |
| Fe <sub>3</sub> O <sub>4</sub> /Fe-CNTs          |                      | 82.1%                          | 6         |
| Fe <sub>3</sub> O <sub>4</sub> -NC               |                      | 97%                            | 7         |
| rGO-Fe <sub>3</sub> O <sub>4</sub> -MWCNT        |                      | 94%                            | 8         |
| N-graphene/Fe <sub>3</sub> O <sub>4</sub>        |                      | 95%                            | 9         |
| GO/Fe <sub>3</sub> O <sub>4</sub> NCs            |                      | 91%                            | 10        |
| LF                                               | Nearly 100%          | This work                      |           |

**Table S5** Comparison of the cycle stability, energy density and coulombic efficiency with various SC.

| Material                                    | Cycle stability | Energy density<br>(uWh/cm <sup>2</sup> ) | Coulombic<br>efficiency | Ref       |
|---------------------------------------------|-----------------|------------------------------------------|-------------------------|-----------|
| LIG/Fe <sub>3</sub> O <sub>4</sub>          | 74% (900)       | 60.20 (1mA/cm <sup>2</sup> )             | 90.2%                   | 71        |
| Mxene/Fe <sub>3</sub> O <sub>4</sub> /MXene | 91.7% (2000)    | 0.970 (0.5 mA/cm <sup>2</sup> )          | nearly 100%             | 72        |
| CF- Fe <sub>3</sub> O <sub>4</sub>          | 86.1% (10000)   | 5 (1 mA/cm <sup>2</sup> )                | 88.8%                   | 75        |
| LIG/TiO <sub>2</sub> /LIG                   | 100% (10000)    | 3.07 (0.05 mA/cm <sup>2</sup> )          | /                       | 76        |
| LIG                                         | 95% (6000)      | 4.27 (0.5 mA/cm <sup>2</sup> )           | 87.5%                   | 77        |
| LF                                          | 86.8% (10000)   | 33.25 (1 mA/cm <sup>2</sup> )            | nearly100%              | This work |

**Table S6** Comparison of the coulombic efficiency with various SC.



## References (Supplemental files):

- 1 A. Moysiewicz, A. Śliwak, E. Miniach and G. Gryglewicz, *Compos. B Eng.*, 2017, **109**, 23-29.
- 2 A. M. Khattak, H. Yin, Z. A. Ghazi, B. Liang, A. Iqbal, N. A. Khan and Z. Tang, *RSC adv*, 2016, **6**, 58994-59000.
- 3 G. Bhattacharya, G. Kandasamy, N Soin, R. K. Upadhya, S. Deshmukh, D. Maity, J. McLaughlin and S. S. Roy, *RSC Adv.*, 2017, **7**, 327-335.
- 4 R. Kumar, R. K. Singh, R. A. Vaz, R. Savu and A. S. Moshkalev, *ACS Appl. Mater. Interfaces*, 2017, **9**, 8880-8890.
- 5 S. Guo, Z. Lou, L. Li, Z. Chen, X. Ma and G. Shen, *Nano Res.*, 2016, **9**, 424-434.
- 6 J. Sun, P. Zan, X. Yang, L. Ye and L. Zhao, *Electrochim. Acta*, 2016, **215**, 483-491.
- 7 J. Zhou, C. Zhang, T. Niu, R. Huang, S. Li, J. Zhang and J. G. Chen, *ACS Appl. Energy Mater.*, 2018, **1**, 4599-465.
- 8 S. Ranmanathan, M. Sasikumar, N. Radhika, A. Obadih, A. Durairaj, G. Swetha, P. Santhoshkumar, I. Lydia and S. Vasanthkumar, *Mater. Today: Proc.*, 2021, **47**, 843-852.
- 9 L. Li, Y. Dou, L. Wang, M. Luo and J. Liang, *RSC adv*, 2014, **4**, 25658-25665.
- 10 H. Ragupathi, J. Mariadhs, K. Venkatesh and S. S. R. Inbaanathean, *Colloids Surf. A Physicochem. Eng. Asp.*, 2024, **683**, 132927.
- 11 L. Chen, C. Shi, X. Li, Z. Mi, D. Wang, H. Liu and L. Qiao, *Materials*, 2017, **10**, 273.
- 12 Z. He, Y. Wang, Y. Li, J. Ma, Y. Song, X. Wang and F. Wang, *J Alloy Compd.*, 2022, **899**, 163241.
- 13 L. Canil, T. Cramer, B. Fraboni, D. Ricciarelli, D. Meggiolaro, A. Singh and A. Abate, *Energy Environ. Sci.*, 2021, **14**, 1429-1438.
- 14 S. K. Kumar, D. Pandey and J. Thomsa, *ACS Energy Lett.*, 2021, **6**, 3590-3599.
- 15 Z. Liu, W. Gao, L. Liu, S. Luo, C. Zhang, T. Yue and J. Wan and J. Hazard, *Mater.*, 2023, **442**, 130036.
- 16 P. Xia, S. Cao, B. Zhu, M. Liu, M. Shi, J. Yu and Y. Zhang, *Angew. Chem. Int. Ed.*, 2020, **59**, 5218-5225.
- 17 H. Y. Zhang, L. X. Li, W. J. Sun, J. H. He, Q. F. Xu and J. M. Lu, *ChemElectroChem*,

- 2023, **10**, 1-7.
- 18 M. Hassan, K. R. Reddy, E. Haque, S. N. Faisal, S. Ghasemi, A. I. Minett and V. G. Gomes, *Compos Sci Technol*, 2014, **98**, 1-8.
- 19 M. N. El-Shafai, S.M. Ramodan, A. A. Alayyafi, S. Y. Mostafa and I. El-Mehasseb, *J. Energy Storage*, 2024, **76**, 109727.
- 20 A. M. Navarro-Suárez, K. Maleski, T. Makaryan, J. Yan, B. Anasori and Y. Gogotsi, *Batteries Supercaps*, 2018, **1**, 33-38.
- 21 Z. Wei, Y. Liu, J. Wang, R. Zong, W. Yao, J. Wang and Y. Zhu, *Nanoscale*, 2015, **7**, 13943 –13950.
- 22 J. J. Li, B. Weng, S. C. Cai, J. Chen, H. P. Jia, Y. J. Xu and J. Hazard, *Mater*, 2018, **342**, 661–669.
- 23 W. Zhen, W. Wang, W. Li, X. Bai, J. Zhao, E. C. M. Tse, D. L. Phillips and Y. Zhu, *Angew. Chem. Int. Ed*, 2021, **60**, 8236-8242.
